# Supplementary material for: A Bayesian Semi-Parametric Model for Thermal Proteome Profiling
Source: Research Square preprint supplement (doi:10.21203/rs.3.rs-123631/v1), 2020-12-18
Supplement: Supplementary file 1 [file f81d241aa314966ea3e9fffc.xlsx]

## Sheet: Overview
Guide to fields
Sheet	Description	Dataset
AtpSemiExplained	Proteins with 5% more variance explained by Semi-parameteric model vs sigmoid model	ATP
Dat0SemiExplained	Proteins with 5% more variance explained by Semi-parameteric model vs sigmoid model	Dasatinib 0
Dat5SemiExplained	Proteins with 5% more variance explained by Semi-parameteric model vs sigmoid model	Dasatinib 5
PabSigmoidHits	Proteins with posterior probablity > 0.99 for alternative using Bayesian sigmoid model	Panobinostat
PabSemiExplained	Proteins with 5% more variance explained by Semi-parameteric model vs sigmoid model	Panobinostat
PabSemiHits	Proteins with posterior probablity > 0.99 for alternative using Bayesian semiparametric model	Panobinostat
StaSigmoidHits	Proteins with posterior probablity > 0.99 for alternative using Bayesian sigmoid model	staurosporine
StaSemiExplained	Proteins with 5% more variance explained by Semi-parameteric model vs sigmoid model	staurosporine

## Sheet: AtpSemiExplained
	x
1	ACOT7
2	APOB48R
3	ASPM
4	ATP1A1
5	ATP1B3
6	BSG
7	BUD13
8	C10ORF28
9	C11ORF68
10	C14ORF166
11	CASC3
12	CCDC41
13	CCDC86
14	CD47
15	CD55
16	CD63
17	CETN3
18	CMAS
19	CSRP1
20	CSTF2
21	CTSZ
22	CUX1
23	DAP
24	DDB2
25	DHX8
26	DLAT
27	DLST
28	DNASE2
29	EIF4B
30	ENSA
31	EXOSC2
32	EXOSC5
33	EXOSC6
34	EXOSC7
35	EXOSC8
36	EXOSC9
37	FAM96A
38	FLOT1
39	FLOT2
40	FTH1
41	FTL
42	GLRX
43	GM2A
44	GSTO1
45	HEXIM1
46	HIST1H1B
47	HIST1H1C
48	HN1L
49	HNRNPAB
50	HNRNPD
51	HNRPDL
52	HPS3
53	HSP90AA4P
54	ICAM5
55	KIAA1109
56	LMAN2
57	LOC349114
58	LOC442497
59	LOC650788
60	LSM6
61	LYSMD1
62	MARCKS
63	MCAM
64	MCCC2
65	MED16
66	MIER1
67	MRPL12
68	MRPL19
69	MRPL46
70	MRPS28
71	NCL
72	NIF3L1
73	NSBP1
74	PDAP1
75	PQBP1
76	PSMB7
77	PTPRA
78	PTPRC
79	PURA
80	PURB
81	QPRT
82	RAP1B
83	RAP2B
84	RCHY1
85	RCSD1
86	RG9MTD2
87	RHOXF2
88	RP2
89	RPL11
90	RPL12
91	RPL13
92	RPL19
93	RPL28
94	RPL35
95	RPL35A
96	RPL5
97	RPL7
98	RPS12
99	RPS21
100	RPSA
101	RRAGC
102	RRP15
103	RTN4
104	SCAF1
105	SERBP1
106	SFN
107	SFRS1
108	SKIV2L2
109	SLC1A5
110	SLC25A5
111	SLC2A3
112	SLC7A5
113	SNRPC
114	SPEN
115	TBC1D22B
116	TFRC
117	TPM4
118	TXNL4A
119	VDAC2
120	WBP4
121	WIPF1
122	ZCCHC3
123	ZMAT2
124	ZNF853

## Sheet: Dat0SemiExplained
	x
1	18 KDA PROTEIN.
2	42 KDA PROTEIN.
3	A8MSH2
4	AARS2
5	ABCE1
6	ABCF2
7	ABHD10
8	ACAA2
9	ACAD10
10	ACAD8
11	ACAD9
12	ACADM
13	ACADS
14	ACADSB
15	ACADVL
16	ACAT1
17	ACAT2
18	ACIN1
19	ACN9
20	ACO2
21	ACOT7
22	ACOT9
23	ACOX1
24	ACSF2
25	ACSF3
26	ACTC1
27	ACTR10
28	ACY1
29	ADA
30	ADAL
31	ADAM10
32	ADH5
33	AGA
34	AGPS
35	AHCY
36	AHCYL2
37	AHNAK
38	AIFM1
39	AK2
40	AK3
41	AK3L1
42	AKAP8
43	ALAD
44	ALDH18A1
45	ALDH1A1
46	ALDH1A2
47	ALDH1B1
48	ALDH1L2
49	ALDH2
50	ALDH4A1
51	ALDH5A1
52	ALDH6A1
53	ALDOA
54	ALDOC
55	ANAPC4
56	ANTXR2
57	APEH
58	APIP
59	APOA1BP
60	APOB
61	APOB48R
62	APOBEC3G
63	ARG2
64	ARGLU1
65	ARL6IP1
66	ARL6IP4
67	ARL8B
68	ARMET
69	ARPC1A
70	ARSA
71	ARSB
72	ASAH1
73	ASXL1
74	ATF1
75	ATOX1
76	ATP5A1
77	ATP5B
78	ATP5C1
79	ATP5E
80	ATP5F1
81	ATP6V1A
82	ATPAF1
83	ATPAF2
84	ATPIF1
85	AUH
86	BAG3
87	BANF1
88	BAT2
89	BAT2D1
90	BAX
91	BCAP31
92	BCAT1
93	BCAT2
94	BCKDHA
95	BLMH
96	BNIP2
97	BOLA3
98	BPGM
99	BPHL
100	BPNT1
101	BRE
102	BSG
103	BTF3
104	BTF3L4
105	BYSL
106	C11ORF58
107	C11ORF59
108	C12ORF43
109	C12ORF45
110	C12ORF45
111	C14ORF126
112	C14ORF156
113	C15ORF40
114	C15ORF57
115	C16ORF61
116	C17ORF89
117	C18ORF25
118	C19ORF10
119	C19ORF43
120	C19ORF62
121	C1ORF103
122	C1ORF116
123	C1ORF128
124	C1ORF144
125	C1ORF149
126	C1ORF163
127	C1ORF31
128	C1ORF69
129	C1QBP
130	C20ORF7
131	C20ORF72
132	C21ORF33
133	C2ORF56
134	C3ORF10
135	C3ORF19
136	C3ORF60
137	C3ORF75
138	C5ORF33
139	C6ORF108
140	C6ORF125
141	C6ORF66
142	C8ORF82
143	C9ORF142
144	C9ORF78
145	C9ORF82
146	CABC1
147	CALB1
148	CALM1
149	CALU
150	CANX
151	CARKD
152	CARS2
153	CASC3
154	CASK
155	CASP3
156	CASP6
157	CAST
158	CAT
159	CBR4
160	CCAR1
161	CCBL2
162	CCDC117
163	CCDC12
164	CCDC124
165	CCDC44
166	CCDC50
167	CCDC58
168	CCDC86
169	CCDC9
170	CCT2
171	CCT3
172	CCT4
173	CCT5
174	CCT6A
175	CCT7
176	CCT8
177	CD3EAP
178	CD47
179	CD53
180	CD59
181	CD63
182	CD81
183	CD97
184	CDC42BPA
185	CDK7
186	CDKN1B
187	CDV3
188	CECR5
189	CETN2
190	CFDP1
191	CFH
192	CHAF1B
193	CHCHD2
194	CHCHD3
195	CHCHD4
196	CHCHD5
197	CHCHD7
198	CHCHD8
199	CHMP4A
200	CHMP4B
201	CHMP5
202	CIRH1A
203	CKS1B
204	CLPB
205	CLPP
206	CLPX
207	CLSPN
208	CLTA
209	CLTB
210	CLTC
211	CLYBL
212	CNPY3
213	COG8
214	COPS3
215	COPS8
216	COQ9
217	COX4I1
218	COX5A
219	COX5B
220	COX6B1
221	CPOX
222	CPSF3L
223	CPT2
224	CRAT
225	CREB1
226	CRELD2
227	CRYM
228	CS
229	CSDA
230	CSRP1
231	CSTA
232	CSTF1
233	CSTF3
234	CTBP1
235	CTCF
236	CTF8
237	CTH
238	CTTN
239	CUTA
240	CWC15
241	CYB5R2
242	CYB5R3
243	CYCS
244	DAP
245	DAP3
246	DARS2
247	DBN1
248	DBT
249	DCD
250	DCI
251	DCTD
252	DDB1
253	DDX21
254	DDX23
255	DDX49
256	DECR1
257	DGUOK
258	DHRS2
259	DHRS4
260	DHTKD1
261	DIABLO
262	DICER1
263	DKC1
264	DLAT
265	DLD
266	DLST
267	DNAJC14
268	DNASE2
269	DNLZ
270	DNPEP
271	DPP7
272	DTD1
273	EARS2
274	ECH1
275	ECHDC1
276	ECHDC3
277	ECHS1
278	ECM1
279	EDARADD
280	EDF1
281	EEA1
282	EEF2
283	EFTUD2
284	EIF2C2
285	EIF3A
286	EIF3L
287	EIF4A3
288	EIF4B
289	EIF4EBP1
290	EIF6
291	ELAVL1
292	ELMO1
293	ELP4
294	EMD
295	EMG1
296	ENO1
297	ENO2
298	ENO3
299	ENSA
300	EPB49
301	ERH
302	ETFA
303	ETFB
304	ETHE1
305	EXOSC1
306	EXOSC2
307	EXOSC3
308	EXOSC4
309	EXOSC5
310	EXOSC6
311	EXOSC7
312	EXOSC8
313	EXOSC9
314	FAH
315	FAHD1
316	FAHD2A
317	FAM107B
318	FAM136A
319	FAM171A2
320	FAM175A
321	FAM82B
322	FARS2
323	FASTKD2
324	FASTKD5
325	FBXL19
326	FCGR2C
327	FDX1
328	FDXR
329	FECH
330	FEM1B
331	FGGY
332	FH
333	FHL1
334	FHL3
335	FIP1L1
336	FKBP3
337	FLJ11151
338	FLJ22662
339	FMC1
340	FN3K
341	FN3KRP
342	FNBP4
343	FOXRED1
344	FTH1
345	FTL
346	FUBP1
347	FUCA1
348	FUS
349	FXN
350	G3P1
351	GALNS
352	GAPDH
353	GAR1
354	GARS
355	GATC
356	GBAS
357	GCDH
358	GCSH
359	GEMIN5
360	GEMIN6
361	GFM1
362	GGH
363	GK
364	GLRX
365	GLRX2
366	GLRX5
367	GLS
368	GLUD1
369	GLUD2
370	GM2A
371	GMNN
372	GMPR
373	GMPR2
374	GNG5
375	GNPDA1
376	GNPDA2
377	GNS
378	GOLGA2
379	GOLIM4
380	GOT1
381	GOT2
382	GPHN
383	GPN1
384	GPN2
385	GPN3
386	GPRIN1
387	GRPEL1
388	GRPEL2
389	GRSF1
390	GSR
391	GSS
392	GSTK1
393	GSTT1
394	GTPBP10
395	GTPBP3
396	GUSB
397	H1FX
398	HA-UBIQUITIN
399	HACL1
400	HADH
401	HADHA
402	HADHB
403	HARS2
404	HBA1
405	HBD
406	HBE1
407	HBG1
408	HBXIP
409	HBZ
410	HCG
411	HCG
412	HCG
413	HCG
414	HCLS1
415	HDGF2
416	HDHD2
417	HDHD3
418	HEMGN
419	HEXIM1
420	HIBADH
421	HIBCH
422	HINT2
423	HIST1H1B
424	HIST1H1C
425	HIST1H2AD
426	HMBS
427	HMGB1
428	HMGCL
429	HN1
430	HN1L
431	HNRNPA2B1
432	HNRNPAB
433	HNRNPC
434	HNRNPD
435	HNRPDL
436	HPRT1
437	HRSP12
438	HSCB
439	HSD17B10
440	HSD17B8
441	HSDL2
442	HSP90AA4P
443	HSP90AB3P
444	HSP90AB4P
445	HSPA5
446	HSPA8
447	HSPA9
448	HSPD1
449	HSPE1
450	HTRA2
451	HYPK
452	IARS2
453	ICAM1
454	ID1
455	IDH2
456	IDH3A
457	IDH3B
458	IDH3G
459	IFITM1
460	IGF2BP2
461	IGF2BP3
462	IGF2R
463	IGSF8
464	IKBKG
465	IL18
466	ILF2
467	ILF3
468	IMMT
469	IMPA1
470	INTS4
471	INTS8
472	IPI00073449.1
473	ISCA2
474	ISCU
475	ISOC2
476	ISY1
477	ISYNA1
478	ITGA5
479	ITGB1
480	ITPA
481	JUND
482	KCMF1
483	KCTD10
484	KCTD5
485	KHK
486	KIAA0564
487	KIAA1143
488	KIAA1704
489	KIAA1715
490	KTN1
491	KYNU
492	L2HGDH
493	LACE1
494	LACTB2
495	LAMP1
496	LARS2
497	LASP1
498	LDB1
499	LDHA
500	LDHB
501	LGALS3BP
502	LIAS
503	LIMA1
504	LLGL2
505	LMAN1
506	LMNA
507	LNPEP
508	LOC100130553
509	LOC100130562
510	LOC100130932
511	LOC100132728
512	LOC100133623
513	LOC100133930
514	LOC348262
515	LOC349114
516	LOC388474
517	LOC442497
518	LOC650788
519	LOC653156
520	LOC728658
521	LONP1
522	LPIN3
523	LRPAP1
524	LRPPRC
525	LRRFIP1
526	LRRFIP2
527	LSM1
528	LSM2
529	LSM3
530	LSM4
531	LSM5
532	LSM6
533	LSM7
534	LSM8
535	LTV1
536	LYRM1
537	LYRM2
538	LYRM5
539	LYRM7
540	M11S1
541	MACROD1
542	MAGEA4
543	MAK16
544	MAN2B1
545	MAP4
546	MAPKSP1
547	MAPT
548	MARCKS
549	MARCKSL1
550	MARS2
551	MAST2
552	MCAM
553	MCAT
554	MCCC1
555	MCCC2
556	MDH2
557	MDP-1
558	MECR
559	METAP2
560	METTL5
561	METTL7A
562	MFAP1
563	MIPEP
564	Mitsugumin 23
565	MLYCD
566	MMAB
567	MNAT1
568	MOCS1
569	MOCS2
570	MRM1
571	MRPL12
572	MRPL17
573	MRPL37
574	MRPL39
575	MRPL49
576	MRPL53
577	MRPS12
578	MRPS15
579	MRPS2
580	MRPS22
581	MRPS23
582	MRPS26
583	MRPS27
584	MRPS28
585	MRPS31
586	MRPS34
587	MRPS35
588	MRPS36
589	MRPS5
590	MRPS6
591	MRPS7
592	MRPS9
593	MRRF
594	MSRB2
595	MT1E
596	MT2A
597	MTCP1
598	MTDH
599	MTFMT
600	MTHFD1L
601	MTHFD2
602	MTHFSD
603	MTO1
604	MTRF1L
605	MUT
606	MYADM
607	MYL4
608	NACA
609	NADK
610	NAGA
611	NAPRT1
612	NARS2
613	NCOA6
614	NDUFA2
615	NDUFA5
616	NDUFA6
617	NDUFAB1
618	NDUFAF2
619	NDUFB9
620	NDUFS1
621	NDUFS2
622	NDUFS3
623	NDUFS4
624	NDUFS6
625	NDUFV1
626	NDUFV2
627	NDUFV3
628	NENF
629	NF2
630	NFS1
631	NFU1
632	NFYA
633	NHLRC3
634	NHP2
635	NHP2L1
636	NIF3L1
637	NIP30
638	NIPBL
639	NIPSNAP1
640	NIPSNAP3A
641	NIT1
642	NME1-NME2
643	NME3
644	NME6
645	NMNAT1
646	NOL11
647	NOL7
648	NOLC1
649	NOTCH1
650	NP
651	NPC2
652	NPM3
653	NPTN
654	NQO2
655	NT5C
656	NT5DC2
657	NT5DC3
658	NUBPL
659	NUCB1
660	NUCB2
661	NUCKS1
662	NUDT16
663	NUDT19
664	NUDT5
665	NUDT6
666	NUDT8
667	NUP50
668	NUTF2
669	OAT
670	OGDH
671	OPHN1
672	OXCT1
673	OXNAD1
674	OXSM
675	PAFAH1B1
676	PAICS
677	PAK1IP1
678	PARN
679	PARS2
680	PC
681	PCBD1
682	PCBD2
683	PCCA
684	PCCB
685	PCK2
686	PCNP
687	PDAP1
688	PDCD5
689	PDCL3
690	PDHA1
691	PDHB
692	PDHX
693	PDK1
694	PDLIM1
695	PDPR
696	PDSS1
697	PDSS2
698	PDXK
699	PDXP
700	PECI
701	PELP1
702	PET112L
703	PFDN5
704	PFDN6
705	PFKL
706	PFKM
707	PFKP
708	PGAM1
709	PGCP
710	PGM2
711	PGP
712	PGRMC2
713	PHACTR4
714	PHB
715	PHB2
716	PHF5A
717	PITRM1
718	PLA2G15
719	PLD3
720	PLRG1
721	PLSCR1
722	PLXNB2
723	PMPCA
724	PMPCB
725	PNO1
726	PNPT1
727	POLDIP2
728	POLG
729	POLG2
730	POLR1B
731	POLR2A
732	POLR2D
733	POLR2G
734	POLR2I
735	POLR2K
736	POLR3F
737	POLRMT
738	POP5
739	PPA2
740	PPAT
741	PPCDC
742	PPIF
743	PPOX
744	PPP1CC
745	PPP1R11
746	PRCC
747	PRDX3
748	PRDX4
749	PRKCSH
750	PRKDC
751	PRMT5
752	PRPF19
753	PRPF3
754	PRPF4
755	PRPS1
756	PRPS2
757	PRPSAP2
758	PRRC1
759	PRTFDC1
760	PSAP
761	PSMA1
762	PSMA2
763	PSMA3
764	PSMA4
765	PSMA5
766	PSMA6
767	PSMA7
768	PSMB1
769	PSMB2
770	PSMB3
771	PSMB4
772	PSMB5
773	PSMB6
774	PSMB7
775	PSMB8
776	PSMB9
777	PSMC1
778	PSMD1
779	PSME3
780	PSMG3
781	PSMG4
782	PSPH
783	PTCD3
784	PTER
785	PTGES2
786	PTGFRN
787	PTMA
788	PURA
789	PURB
790	PVR
791	PVRL2
792	PWP2
793	PYCR1
794	PYCR2
795	PYCRL
796	PYGB
797	PYGL
798	QPRT
799	QRSL1
800	QSOX1
801	QTRT1
802	QTRTD1
803	RAB5C
804	RAD21
805	RAD23B
806	RAD51AP1
807	RALY
808	RAP1A
809	RAP1B
810	RAP2B
811	RAP2C
812	RARS2
813	RBBP5
814	RBM3
815	RBM42
816	RBMX
817	RCL1
818	RCN1
819	RCSD1
820	RDH13
821	REEP6
822	REXO2
823	RFC3
824	RFXAP
825	RG9MTD1
826	RHAG
827	RIOK1
828	RIOK2
829	RNF113A
830	RNF4
831	RNMTL1
832	ROBLD3
833	RPIA
834	RPL10
835	RPL10A
836	RPL11
837	RPL12
838	RPL13
839	RPL18A
840	RPL22
841	RPL23A
842	RPL24
843	RPL26
844	RPL27
845	RPL3
846	RPL30
847	RPL34
848	RPL35
849	RPL35A
850	RPL37A
851	RPL38
852	RPL4
853	RPL5
854	RPL6
855	RPL7
856	RPL8
857	RPL9
858	RPLP2
859	RPS10
860	RPS11
861	RPS12
862	RPS13
863	RPS15
864	RPS15A
865	RPS16
866	RPS17
867	RPS19
868	RPS20
869	RPS21
870	RPS23
871	RPS24
872	RPS25
873	RPS27A
874	RPS3
875	RPS3A
876	RPS4X
877	RPS5
878	RPS6
879	RPS7
880	RPS8
881	RPS9
882	RPSA
883	RRAGC
884	RRBP1
885	RRM2
886	RRM2B
887	RRP15
888	RRP9
889	RSL1D1
890	RTN3
891	RTN4
892	RUVBL1
893	RUVBL2
894	SAFB
895	SAFB2
896	SARS2
897	SARS2
898	SART1
899	SCAMP2
900	SCAMP3
901	SDF4
902	SDHA
903	SDHB
904	SDSL
905	SELENBP1
906	SEPHS1
907	SEPHS2
908	SEPSECS
909	SERBP1
910	SFN
911	SFRS1
912	SFRS10
913	SFRS2
914	SFRS3
915	SFRS5
916	SFRS7
917	SFRS9
918	SGSH
919	SHMT1
920	SHMT2
921	SIAE
922	SKIV2L2
923	SLC16A1
924	SLC1A4
925	SLC1A5
926	SLC25A1
927	SLC25A3
928	SLC25A5
929	SLC29A1
930	SLC30A1
931	SLC39A14
932	SLC7A1
933	SLC7A11
934	SLC7A5
935	SLC7A6
936	SLC9A3R2
937	SLTM
938	SMC1A
939	SMC3
940	SMNDC1
941	SMS
942	SMU1
943	SNAP23
944	SNAP29
945	SNAPC5
946	SNCG
947	SNRNP27
948	SNRPA
949	SNRPA1
950	SNRPB
951	SNRPB2
952	SNRPC
953	SNRPD1
954	SNRPD2
955	SNRPD3
956	SNRPE
957	SOD1
958	SOD2
959	SORD
960	SORT1
961	SPN
962	SPRYD4
963	SRP14
964	SSBP1
965	SSSCA1
966	STAG2
967	STC2
968	STMN1
969	STMN3
970	STOML2
971	STT3A
972	STX3
973	STX7
974	SUCLA2
975	SUCLG1
976	SUCLG2
977	SUPV3L1
978	SYF2
979	SYNGR2
980	TACC3
981	TARS2
982	TATDN1
983	TATDN2
984	TATDN3
985	TBRG4
986	TCOF1
987	TCP1
988	TFAM
989	TFB1M
990	TFB2M
991	TFR2
992	TFRC
993	THEM2
994	THEM4
995	THNSL1
996	THOC4
997	THOC5
998	THOC6
999	TIMM10
1000	TIMM13
1001	TIMM44
1002	TIMM8A
1003	TIMM8B
1004	TIMM9
1005	TIMP1
1006	TK1
1007	TK2
1008	TKT
1009	TKTL1
1010	TMEM106B
1011	TMEM159
1012	TMF1
1013	TMLHE
1014	TMPO
1015	TMPO
1016	TNFRSF8
1017	TNIP2
1018	TNKS1BP1
1019	TOR1AIP1
1020	TP53I3
1021	TPD52L2
1022	TPI1
1023	TPK1
1024	TPM1
1025	TPM4
1026	TPX2
1027	TRAP1
1028	TRMT2B
1029	TRMT61B
1030	TRMU
1031	TROVE2
1032	TSN
1033	TSNAX
1034	TSSC4
1035	TTN
1036	TUFM
1037	TWSG1
1038	TXN
1039	TXNDC9
1040	TXNL4A
1041	TXNRD2
1042	UBAP2
1043	UBAP2
1044	UBAP2L
1045	UBQLN1
1046	UBXN2A
1047	UQCRB
1048	UQCRC2
1049	UQCRFS1
1050	UQCRH
1051	UROD
1052	USP39
1053	UTP14A
1054	UTP15
1055	VAMP8
1056	VARS2
1057	VBP1
1058	VCL
1059	VCP
1060	VDAC2
1061	VDAC3
1062	VIM
1063	VTN
1064	WARS2
1065	WBP11
1066	WBSCR16
1067	WDFY1
1068	WDR43
1069	WDR89
1070	WDSOF1
1071	XPNPEP3
1072	YBX1
1073	YEATS4
1074	ZADH2
1075	ZC3H18
1076	ZC3H4
1077	ZCCHC8
1078	ZDHHC5
1079	ZFAND6
1080	ZMAT2
1081	ZNF414
1082	ZNF579
1083	ZNF622
1084	ZNF691
1085	ZNF830
1086	ZRANB2
1087	ZYX

## Sheet: Date5SemiExplained
	x
1	37500
2	40787
3	42 KDA PROTEIN.
4	A8MSH2
5	AAMP
6	ABCE1
7	ABCF2
8	ABHD10
9	ABT1
10	ACAA1
11	ACAA2
12	ACAD9
13	ACADM
14	ACADVL
15	ACAT2
16	ACIN1
17	ACOT7
18	ACOT8
19	ACOT9
20	ACOX1
21	ACTR10
22	ACY1
23	ADA
24	ADAL
25	ADH5
26	AGA
27	AHCY
28	AHNAK
29	AIFM1
30	AK2
31	AK3
32	AKT1S1
33	ALAD
34	ALDH1A1
35	ALDH1A2
36	ALDH2
37	ALDH5A1
38	ALDOA
39	ALDOC
40	ANTXR2
41	APEH
42	APIP
43	APOA1BP
44	APOB
45	APOB48R
46	APOBEC3G
47	ARG2
48	ARGLU1
49	ARL5A
50	ARL6IP4
51	ARL8B
52	ARMET
53	ARPC1A
54	ARPP-19
55	ARSA
56	ARSB
57	ASAH1
58	ATF1
59	ATOX1
60	ATP5A1
61	ATP5B
62	ATP5C1
63	ATP5E
64	ATP6V1A
65	ATPIF1
66	AZI1
67	BACH1
68	BAG2
69	BAG3
70	BANF1
71	BAT2
72	BAT2D1
73	BCAP31
74	BCAT1
75	BCAT2
76	BCL7A
77	BCLAF1
78	BLMH
79	BOLA3
80	BPGM
81	BPNT1
82	BRCC3
83	BRE
84	BSG
85	BTF3
86	BTF3L4
87	BYSL
88	C10ORF54
89	C11ORF58
90	C12ORF43
91	C12ORF44
92	C12ORF45
93	C14ORF126
94	C17ORF89
95	C18ORF25
96	C19ORF10
97	C19ORF25
98	C19ORF43
99	C19ORF62
100	C1ORF128
101	C1ORF144
102	C1ORF52
103	C21ORF33
104	C3ORF10
105	C3ORF19
106	C3ORF60
107	C3ORF75
108	C6ORF108
109	C6ORF66
110	C9ORF142
111	C9ORF78
112	CALB1
113	CALU
114	CANX
115	CARKD
116	CARS2
117	CASC3
118	CASP3
119	CASP6
120	CAST
121	CAT
122	CBR4
123	CCBL2
124	CCDC117
125	CCDC12
126	CCDC124
127	CCDC50
128	CCDC55
129	CCDC58
130	CCNH
131	CCT2
132	CCT3
133	CCT4
134	CCT5
135	CCT6A
136	CCT7
137	CCT8
138	CD47
139	CD55
140	CD59
141	CD63
142	CDC42BPA
143	CDC42EP4
144	CDK7
145	CDV3
146	CFDP1
147	CHAF1B
148	CHCHD2
149	CHCHD3
150	CHCHD7
151	CHMP4A
152	CHMP4B
153	CHMP5
154	CIRBP
155	CIRH1A
156	CLSPN
157	CLTA
158	CLTB
159	CLYBL
160	CMTM6
161	CNBP
162	CNPY3
163	COG8
164	COPS3
165	COPS8
166	COX4I1
167	COX5A
168	COX5B
169	CREB1
170	CRELD2
171	CSDA
172	CSRP1
173	CSTA
174	CSTF1
175	CSTF3
176	CTBP1
177	CTCF
178	CTF8
179	CTH
180	CTPS2
181	CTSC
182	CTTN
183	CWC15
184	CYB5R2
185	CYTSB
186	DAP
187	DBN1
188	DCD
189	DCI
190	DCTD
191	DDB1
192	DDX21
193	DDX49
194	DECR1
195	DENND2C
196	DGUOK
197	DHRS2
198	DIABLO
199	DKC1
200	DLAT
201	DLD
202	DLST
203	DNAJC14
204	DNASE2
205	DNLZ
206	DNPEP
207	DPAGT1
208	DPP7
209	DTD1
210	ECH1
211	ECHDC1
212	EDF1
213	EEA1
214	EFTUD2
215	EIF1
216	EIF3A
217	EIF3L
218	EIF4A3
219	EIF4B
220	EIF4EBP1
221	EIF6
222	ELAVL1
223	ELMO2
224	EMD
225	EMG1
226	ENO1
227	ENO2
228	ENO3
229	ENSA
230	ENY2
231	EPCAM
232	ERCC8
233	ERH
234	ETFA
235	ETFB
236	ETHE1
237	EWSR1
238	EXOSC1
239	EXOSC10
240	EXOSC2
241	EXOSC3
242	EXOSC4
243	EXOSC5
244	EXOSC6
245	EXOSC7
246	EXOSC8
247	EXOSC9
248	FAH
249	FAHD1
250	FAM107B
251	FAM136A
252	FASTKD2
253	FBL
254	FCGR2C
255	FHL3
256	FIP1L1
257	FIS1
258	FKBP3
259	FKBP7
260	FLJ11151
261	FN1
262	FN3K
263	FN3KRP
264	FNBP4
265	FTH1
266	FTL
267	FUBP1
268	FUCA1
269	FUCA2
270	FUS
271	FXN
272	G3P1
273	GALNS
274	GAPDH
275	GARS
276	GBAS
277	GCDH
278	GCSH
279	GEMIN6
280	GGH
281	GGPS1
282	GK
283	GLRX
284	GM2A
285	GMNN
286	GMPR
287	GMPR2
288	GNG5
289	GNPDA1
290	GNPDA2
291	GNS
292	GOLGA2
293	GOT1
294	GOT2
295	GPHN
296	GPN1
297	GPN2
298	GPN3
299	GPRIN1
300	GRPEL1
301	GSR
302	GSS
303	GSTT1
304	GTF2A1
305	GTF2A2
306	GUSB
307	H1FX
308	H2AFX
309	H2AFY
310	H3F3A
311	HACL1
312	HADH
313	HARS2
314	HBA1
315	HBD
316	HBZ
317	HCG
318	HCG
319	HCG
320	HCG
321	HCLS1
322	HDHD2
323	HDHD3
324	HEMGN
325	HEXIM1
326	HIBADH
327	HINT2
328	HIST1H1B
329	HIST1H1C
330	HIST1H1D
331	HIST1H2AD
332	HIST1H4A
333	HIST2H2BA
334	HMBS
335	HMGA1
336	HMGCL
337	HN1
338	HN1L
339	HNRNPA2B1
340	HNRNPA3
341	HNRNPAB
342	HNRNPC
343	HNRNPD
344	HNRNPH3
345	HNRNPL
346	HNRNPR
347	HNRPDL
348	HOMER1
349	HPRT1
350	HRC
351	HRSP12
352	HSD17B10
353	HSD17B8
354	HSPA5
355	HSPA8
356	HSPA9
357	HSPD1
358	HSPE1
359	HTRA2
360	HYPK
361	HYPOTHETICAL PROTEIN (FRAGMENT).
362	ICAM1
363	ID1
364	IDH2
365	IDI1
366	IFI30
367	IFITM1
368	IGF2BP2
369	IGF2R
370	IKBKG
371	IL18
372	ILF3
373	IMMT
374	IMPA1
375	INTS4
376	ISCU
377	ISY1
378	ISYNA1
379	ITGA5
380	ITGB1
381	ITPA
382	KCTD3
383	KHK
384	KIAA0652
385	KIAA1143
386	KIAA1704
387	KPNA3
388	KTN1
389	KYNU
390	LACE1
391	LACTB2
392	LAGE3
393	LAMP1
394	LAMP2
395	LANCL2
396	LAP3
397	LASP1
398	LBR
399	LDB1
400	LDHA
401	LDHB
402	LEPRE1
403	LGALS3BP
404	LIMA1
405	LMAN2
406	LMNA
407	LMNB1
408	LMNB2
409	LOC100130553
410	LOC100130562
411	LOC100132728
412	LOC100133623
413	LOC100133930
414	LOC348262
415	LOC349114
416	LOC388474
417	LOC442497
418	LOC650788
419	LOC653156
420	LOC728658
421	LPIN3
422	LRPAP1
423	LRRC59
424	LRRFIP1
425	LRRFIP2
426	LSM2
427	LSM4
428	LSM6
429	LSM7
430	LSM8
431	LTF
432	LTV1
433	M11S1
434	MAGEA4
435	MAGEB2
436	MAK16
437	MAN2B1
438	MAP4
439	MAPKSP1
440	MAPT
441	MARS2
442	MCAM
443	MCCC1
444	MCCC2
445	MCEE
446	MDH2
447	MDP-1
448	METTL5
449	METTL6
450	MFAP1
451	MMAB
452	MNAT1
453	MOCS2
454	MRPL12
455	MRPL17
456	MRPL39
457	MRPL46
458	MRPS11
459	MRPS23
460	MRPS27
461	MRPS28
462	MRPS34
463	MRPS36
464	MT2A
465	MTCP1
466	MTHFSD
467	MYL4
468	MYO1C
469	NACA
470	NADK
471	NAGA
472	NAPRT1
473	NCSTN
474	NDUFA2
475	NDUFA5
476	NDUFA7
477	NDUFAB1
478	NDUFAF2
479	NDUFS1
480	NDUFS6
481	NDUFV1
482	NDUFV2
483	NDUFV3
484	NEFH
485	NENF
486	NFYA
487	NHLRC3
488	NHP2
489	NHP2L1
490	NIF3L1
491	NIP30
492	NIPSNAP1
493	NIPSNAP3A
494	NIPSNAP3B
495	NME1-NME2
496	NME3
497	NME6
498	NMNAT1
499	NOC2L
500	NOL11
501	NOL7
502	NOLC1
503	NP
504	NPC2
505	NPM3
506	NPTN
507	NQO2
508	NSF
509	NT5C
510	NUCB1
511	NUCB2
512	NUCKS1
513	NUDT1
514	NUDT16
515	NUDT5
516	NUP50
517	NUTF2
518	OAT
519	OGDH
520	OXNAD1
521	OXSM
522	PAFAH1B1
523	PAICS
524	PAK1IP1
525	PARN
526	PARS2
527	PCBD1
528	PCBD2
529	PCCA
530	PCNP
531	PDAP1
532	PDCD5
533	PDCL
534	PDHA1
535	PDHB
536	PDHX
537	PDLIM1
538	PDXK
539	PDXP
540	PELP1
541	PER3
542	PEX19
543	PFDN5
544	PFDN6
545	PFKL
546	PFKM
547	PFKP
548	PGAM1
549	PGCP
550	PGLS
551	PGM2
552	PGP
553	PHACTR4
554	PHB
555	PHB2
556	PHF5A
557	PLA2G15
558	PLRG1
559	PLXNB2
560	PNO1
561	POLDIP3
562	POLG2
563	POLR2G
564	POTEF
565	PPAT
566	PPCDC
567	PPP1R11
568	PQBP1
569	PRCP
570	PRDX3
571	PRDX4
572	PRG2
573	PRKCSH
574	PRKDC
575	PRPF19
576	PRPF3
577	PRPF4
578	PRPS1
579	PRPSAP2
580	PRRC1
581	PRTFDC1
582	PSAP
583	PSMA1
584	PSMA2
585	PSMA3
586	PSMA4
587	PSMA5
588	PSMA6
589	PSMA7
590	PSMB1
591	PSMB2
592	PSMB3
593	PSMB4
594	PSMB5
595	PSMB6
596	PSMB7
597	PSMC1
598	PSMD1
599	PSME3
600	PSMG3
601	PSMG4
602	PSPH
603	PTER
604	PTK7
605	PTMA
606	PTMS
607	PTPN1
608	PTPRA
609	PURA
610	PURB
611	PVRL2
612	PWP1
613	PXN
614	PYCR1
615	PYCR2
616	PYCRL
617	PYGB
618	PYGL
619	QPRT
620	QTRTD1
621	RAB7A
622	RAB9A
623	RABEPK
624	RAD21
625	RAD23B
626	RAD51AP1
627	RALY
628	RAP1A
629	RAP1B
630	RBBP4
631	RBBP5
632	RBM14
633	RBM3
634	RBMX
635	RBPJ
636	RCL1
637	RCN1
638	RCSD1
639	REEP6
640	REXO2
641	RG9MTD1
642	RHAG
643	RIOK1
644	RIOK2
645	RNF113A
646	RNF181
647	RNMTL1
648	ROBLD3
649	RPIA
650	RPL10
651	RPL10A
652	RPL11
653	RPL12
654	RPL13
655	RPL18A
656	RPL22
657	RPL23
658	RPL23A
659	RPL24
660	RPL26
661	RPL27
662	RPL3
663	RPL30
664	RPL34
665	RPL35A
666	RPL37A
667	RPL4
668	RPL5
669	RPL6
670	RPL7
671	RPL8
672	RPL9
673	RPLP2
674	RPP14
675	RPP25
676	RPS10
677	RPS11
678	RPS12
679	RPS13
680	RPS14
681	RPS15A
682	RPS16
683	RPS17
684	RPS19
685	RPS20
686	RPS21
687	RPS23
688	RPS24
689	RPS25
690	RPS27A
691	RPS29
692	RPS3
693	RPS3A
694	RPS4X
695	RPS5
696	RPS6KB1
697	RPS7
698	RPS8
699	RPS9
700	RPSA
701	RRAGA
702	RRAGC
703	RRAS2
704	RRBP1
705	RRM2
706	RRM2B
707	RRP15
708	RRP9
709	RTN3
710	RTN4
711	RUVBL1
712	RUVBL2
713	RYBP
714	S100A6
715	SAFB
716	SAFB2
717	SAP18
718	SARS2
719	SART1
720	SCAMP2
721	SCAMP3
722	SCAMP4
723	SDF4
724	SDHB
725	SDSL
726	SEC22B
727	SELENBP1
728	SEMA4C
729	SEPHS1
730	SEPHS2
731	SEPSECS
732	SERBP1
733	SERPINF1
734	SFRS1
735	SFRS10
736	SFRS18
737	SFRS2
738	SFRS2IP
739	SFRS3
740	SFRS4
741	SFRS7
742	SFRS9
743	SGSH
744	SHMT1
745	SHMT2
746	SIAE
747	SKIV2L2
748	SLC16A1
749	SLC19A1
750	SLC1A4
751	SLC1A5
752	SLC25A3
753	SLC25A5
754	SLC2A1
755	SLC38A1
756	SLC38A5
757	SLC7A11
758	SLC7A5
759	SLC9A3R1
760	SLC9A3R2
761	SMC1A
762	SMC3
763	SMNDC1
764	SMS
765	SMTN
766	SMU1
767	SNAP23
768	SNAP29
769	SNCG
770	SNRPA
771	SNRPC
772	SNRPD2
773	SNRPD3
774	SNRPE
775	SOD1
776	SOD2
777	SORD
778	SORT1
779	SPN
780	SPRYD4
781	SRP09
782	SRP14
783	SSBP1
784	STAG2
785	STMN1
786	STMN3
787	STOML2
788	STRAP
789	STX12
790	STX7
791	SUCLA2
792	SYF2
793	TACC1
794	TACC3
795	TAF15
796	TANK
797	TATDN1
798	TATDN3
799	TCOF1
800	TCP1
801	TFAM
802	TFG
803	TFRC
804	TGFB1
805	THEM2
806	THEM4
807	THNSL1
808	THOC4
809	THOC5
810	TIMM10
811	TIMM13
812	TIMM44
813	TIMM8B
814	TIMM9
815	TIMP1
816	TK1
817	TKT
818	TMEM106B
819	TMF1
820	TMLHE
821	TMPO
822	TMPO
823	TMSB10
824	TNFRSF8
825	TNKS1BP1
826	TOMM70A
827	TOP2A
828	TOR1A
829	TOR1AIP1
830	TP53I3
831	TPD52L1
832	TPD52L2
833	TPI1
834	TPK1
835	TPM1
836	TPM4
837	TRAP1
838	TROVE2
839	TSC22D1
840	TSN
841	TSNAX
842	TSSC4
843	TTN
844	TWSG1
845	TXN
846	TXNDC9
847	TXNL4A
848	TXNRD2
849	UBAP2
850	UBAP2L
851	UBQLN1
852	UQCRB
853	UQCRH
854	UROD
855	USP39
856	UTP14A
857	UTP15
858	VAMP8
859	VBP1
860	VCL
861	VCP
862	VDAC1
863	VDAC2
864	VIM
865	VRK3
866	WARS
867	WBP4
868	WBSCR16
869	WDFY1
870	WDR43
871	WDR85
872	WDR89
873	WDSOF1
874	YBX1
875	YEATS4
876	YGR254W
877	ZC3H18
878	ZC3H4
879	ZCCHC8
880	ZCCHC9
881	ZMAT2
882	ZNF622
883	ZNF830
884	ZRANB2
885	ZYX

## Sheet: PabSigmoidHits
	x
1	AKAP8
2	ANKHD1
3	ANPEP
4	DCAF16
5	NA
6	DTD1
7	FBXO42
8	FIGNL1
9	GNB1L
10	H2AFV|H2AFZ
11	HDAC1
12	HDAC10
13	HDAC2
14	HDAC6
15	HDAC8
16	HS1BP3
17	HSPBP1
18	IQSEC2
19	MAN2B2
20	MAP4K4
21	MAPT
22	MBLL|MBNL2
23	NA|IFT80
24	NCBP1
25	NA
26	NFAT5
27	NSMAF
28	NXF1
29	PPP2R5E
30	PRPF6
31	RGL2
32	SEC13
33	SPTBN2
34	STX4
35	TTC38
36	ZFYVE28

## Sheet: PabSemiExplained
	x
1	ABHD10
2	ACAA2
3	ACADM
4	ACADS
5	ACADVL
6	ACAT1
7	ACIN1
8	ACOT13
9	ACOT9
10	AIFM1
11	AK2
12	AK3
13	ALDH1B1
14	ALDH2
15	ALDH5A1
16	AMPD3
17	API5
18	ARF1
19	ARPC1A
20	ATOX1
21	ATP5A1
22	ATP5B
23	ATP5C1
24	ATPIF1
25	BANF1
26	BCAP31
27	BOLA3
28	BSG
29	BTF3
30	C19orf10
31	C21orf33
32	C7orf55
33	C9orf78
34	CALU
35	CAPRIN1
36	CASK
37	CASP6
38	CBR4
39	CCBL2
40	CCDC124
41	CCDC58
42	CCT4
43	CCT5
44	CCT6A
45	CDC42BPA
46	CDV3
47	CFDP1
48	CHAF1B
49	CHCHD10
50	CLTA
51	CLTB
52	CMC4
53	CNPY3
54	COX5B
55	CREB1
56	CRYL1
57	CSTF3
58	CTBP1
59	CTTN
60	CWC15
61	CYCS
62	DCAF13
63	DCAF5|NUCB2
64	DDX49
65	DECR1
66	DGUOK
67	DHRS4
68	DIABLO
69	DLAT
70	DLD
71	DLST
72	DMRT1
73	DNLZ
74	ECH1
75	ECHS1
76	ECI1
77	EDARADD
78	EDF1
79	EEA1
80	EFTUD2
81	EIF3L
82	EIF3S3|EIF3H
83	EIF4B
84	EIF6
85	ELMO1
86	ENSA
87	ERH
88	ETFA
89	ETFB
90	EXOSC1
91	EXOSC2
92	EXOSC3
93	EXOSC4
94	EXOSC5
95	EXOSC6
96	EXOSC7
97	EXOSC8
98	EXOSC9
99	FAHD1
100	FAM136A
101	FAM175A
102	FAM213B
103	FBXL19
104	FBXO42
105	FDX1
106	FGGY
107	FIP1L1
108	FNBP4
109	FTL
110	GBAS
111	GLUD1
112	GLUD2
113	GM2A
114	GMPR
115	GNG5
116	GNPDA1
117	GNS
118	GOLGA2
119	GOT1
120	GOT2
121	GSR
122	HACL1
123	HADH
124	HARS2
125	HDHD3
126	HIBADH
127	HINT2
128	HMGCL
129	HN1L
130	HNRNPAB
131	HNRNPDL
132	HPRT1
133	HSD17B10
134	HSD17B8
135	HSPD1
136	HSPE1
137	HTRA2
138	IARS2
139	IDH2
140	ILF2
141	ILF3
142	IMPA1
143	INTS4
144	ISCU
145	ISOC2
146	ISY1
147	ITPA
148	KLHL18
149	KRT1
150	KRT10
151	KRT2
152	KRT5
153	KRT9
154	LAMTOR2
155	LARP4
156	LMNA
157	LSM1
158	LSM2
159	LSM3
160	LSM4
161	LSM5
162	LSM6
163	LSM7
164	LYRM1
165	LYRM2
166	LYRM4
167	LYRM7
168	MACROD1
169	MAN2B2
170	MANF
171	MAP4K4
172	MAPT
173	MARCKS
174	MCCC1
175	MCCC2
176	MDH2
177	METAP1D
178	METTL5
179	MFAP1
180	MLYCD
181	MMAB
182	MNAT1
183	MRPL12
184	MRPS27
185	MRPS36
186	MTHFD2
187	MUT
188	NACA
189	NCSTN
190	NDUFA5
191	NDUFAB1
192	NDUFS1
193	NDUFS2
194	NDUFS3
195	NDUFS4
196	NDUFS6
197	NDUFV1
198	NDUFV2
199	NFU1
200	NIPSNAP1
201	NIPSNAP3A
202	NOL11
203	NOLC1
204	NSF
205	NT5DC2
206	NUCB1
207	NUCKS1
208	NUP50
209	OAT
210	OXNAD1
211	OXSM
212	PAICS
213	PAK1IP1
214	PARN
215	PDAP1
216	PDCD5
217	PDF
218	PDHA1
219	PDHB
220	PDHX
221	PDPR
222	PDZD11
223	PELP1
224	PHF5A
225	PLXNB2
226	PNMT
227	POLR2G
228	PPA2
229	PRDX3
230	PRDX4
231	PRKDC
232	PRMT6
233	PRPF19
234	PRPF3
235	PRPF4
236	PRRC2A
237	PRRC2C
238	PRTFDC1
239	PSMA2
240	PSMA3
241	PSMA4
242	PSMB2
243	PSMB4
244	PSMB5
245	PSMB7
246	PSMB9
247	PSME3
248	PSMG3
249	PTPN18
250	PTRHD1
251	PWP2
252	PYCR1
253	PYCR2
254	PYGL
255	QDPR
256	QPRT
257	QTRTD1
258	RAD23B
259	RBKS
260	RCL1
261	RCSD1
262	RIOK1
263	RPL12
264	RPL13A
265	RPL17
266	RPL23A
267	RPL27A
268	RPL30
269	RPL7
270	RPL9
271	RPLP2
272	RPS11
273	RPS12
274	RPS13
275	RPS16
276	RPS17|RPS17L
277	RPS18
278	RPS19
279	RPS20
280	RPS21
281	RPS28
282	RPS3
283	RPS4X
284	RPSAP58|RPSA
285	RRM2B
286	RRP15
287	RRP9
288	RUVBL1
289	SARNP
290	SART1
291	SDHA
292	SDHB
293	SEPSECS
294	SERBP1
295	SHKBP1
296	SHMT2
297	SKIV2L2
298	SLC9A3R2
299	SMNDC1
300	SNRPA1
301	SNRPB2
302	SNRPD3
303	SNRPN|SNRPB
304	SOD2
305	SPRYD4
306	SRSF1
307	SRSF5
308	SSBP1
309	STX3
310	STX7
311	SUCLG2
312	TAS2R1
313	TCP1
314	TFAM
315	TFRC
316	THEM4
317	THOC5
318	TIMM10
319	TIMM13
320	TIMM8A
321	TIMM9
322	TK1
323	TMF1
324	TMPO
325	TNKS1BP1
326	TP53I3
327	TPD52L2
328	TPM4
329	TRAP1
330	TSSC4
331	TWSG1
332	TXN
333	TXNDC9
334	TXNL4A
335	TXNRD2
336	UBAP2L
337	UQCC1
338	UQCRB
339	USP39
340	UTP15
341	VCP
342	WBSCR16
343	WDR43
344	WDR89
345	XPNPEP3
346	XRCC4
347	ZCCHC8
348	ZNF830
349	ZRANB2

## Sheet: PabSemiHits
	x
1	ACTR10
2	AKAP8
3	ANAPC7
4	ANKHD1
5	ANPEP
6	ARF5
7	ARMC8
8	CASP6
9	CBFB
10	CCT2
11	CCT4
12	CCT5
13	CCT6A
14	CCT8
15	CEP76
16	COASY
17	CRTAP
18	DCAF16
19	DCTN1
20	DLAT
21	DLST
22	NA
23	DNLZ
24	DTD1
25	EDARADD
26	EXOSC2
27	EXOSC9
28	FBXO42
29	FIGNL1
30	FKBP2
31	GABARAPL2
32	GINS1
33	GIT2
34	GNB1L
35	H2AFV|H2AFZ
36	HARS2
37	HDAC1
38	HDAC10
39	HDAC2
40	HDAC6
41	HDAC7
42	HDAC8
43	HS1BP3
44	HSPBP1
45	IQSEC2
46	LONP1
47	LRRFIP2
48	MAN2B2
49	MAP4K4
50	MAPT
51	MBLL|MBNL2
52	MED18
53	NA|IFT80
54	NCBP1
55	NDUFS4
56	NFAT5
57	NSMAF
58	NXF1
59	PET112
60	PGP
61	PPP2R5E
62	PRDX4
63	PRPF6
64	PSMB3
65	PSMB7
66	PSMC4
67	PSMG3
68	PTPN18
69	RAB3D
70	REPS1
71	RGL2
72	RPL9
73	RPS19
74	RUVBL1
75	SART1
76	SEC13
77	SPTBN2
78	STX4
79	SUPT6H
80	TCP1
81	TPK1
82	TPP1
83	TTC38
84	UTP6
85	WIZ
86	ZFYVE28

## Sheet: StaSigmoidHits
	x
1	AAK1
2	ADK
3	ADRBK1
4	ALDH6A1
5	ALS2
6	AURKA
7	BMP2K
8	C16ORF70
9	C1ORF103
10	CAMK1D
11	CAMK2G
12	CAMKK2
13	CARD8
14	CCNB1
15	CCNB2
16	CDC42BPA
17	CDK2
18	CDK5
19	CHEK2
20	CHMP1A
21	CPOX
22	CREBBP
23	CSK
24	CSNK2A2
25	CTSL1
26	CYCS
27	DDX54
28	DYRK1A
29	FAM96A
30	FECH
31	FER
32	GOLGA2
33	GSK3A
34	GSK3B
35	GTF2A1
36	HEBP1
37	IRAK1
38	IRAK4
39	LIMK2
40	LLGL1
41	LOC650788
42	LYN
43	MAP2K1
44	MAP2K2
45	MAP2K4
46	MAP2K7
47	MAP3K2
48	MAP4K2
49	MAPK12
50	MAPK14
51	MAPK3
52	MAPK8
53	MAPKAPK2
54	MAPKAPK3
55	MAPKAPK5
56	MAPT
57	MARK2
58	MARK3
59	METTL5
60	MKNK1
61	MTFMT
62	MYL6
63	NEDD4L
64	NEIL2
65	NFKBIL2
66	NQO2
67	NUTF2
68	OPA1
69	OSBPL3
70	PAK4
71	PCTK2
72	PDCD10
73	PDPK1
74	PFKFB4
75	PHF21A
76	PHKG2
77	PIK3CD
78	PKN1
79	PLXNA1
80	PMPCA
81	POLG
82	POLR2K
83	PPP2R5E
84	PRKACA
85	PRKAR2A
86	PRKAR2B
87	PRKCB
88	PRKCD
89	PRKCE
90	PRKCQ
91	PTAR1
92	PTK2
93	PZP
94	R3HDM1
95	RAB11B
96	RAB12
97	RAB3B
98	RBM8A
99	RIOK2
100	RPS6KA1
101	RPS6KA3
102	RPS6KA5
103	RRAGA
104	SGK3
105	SLC7A6OS
106	SNRPD1
107	SNX4
108	STK10
109	STK24
110	STK3
111	STK38
112	STK4
113	TBC1D22A
114	TLK2
115	TNIK
116	TTK
117	VRK1
118	ZMYM1

## Sheet: StaSemiExplained
	x
1	ABCC4
2	ABHD10
3	ACIN1
4	ADA
5	AGA
6	AHNAK
7	ALAD
8	ALDOA
9	AP4S1
10	APEH
11	APOB48R
12	APRT
13	ARGLU1
14	ARMC8
15	ARMET
16	ARPP-19
17	ATP1B3
18	ATP5O
19	ATP6V1D
20	ATPIF1
21	BAG2
22	BAT2
23	BAT2D1
24	BCAP31
25	BCL9L
26	BIRC6
27	BLMH
28	BNIP2
29	BOLA3
30	BTF3L4
31	BXDC2
32	C10ORF125
33	C11ORF67
34	C14ORF126
35	C17ORF39
36	C19ORF2
37	C1ORF55
38	C1QBP
39	C5ORF30
40	C6ORF108
41	C6ORF115
42	C9ORF80
43	CALU
44	CARHSP1
45	CAST
46	CAT
47	CCDC58
48	CCDC72
49	CCDC75
50	CCDC86
51	CCDC91
52	CCDC97
53	CCT5
54	CD2BP2
55	CHKB
56	CIRBP
57	CLIP1
58	CLIP2
59	CPSF1
60	CREBBP
61	CRYZL1
62	CSDA
63	CTH
64	CXORF38
65	CYCS
66	DAP
67	DBN1
68	DCD
69	DCTN2
70	DDOST
71	DDRGK1
72	DKC1
73	DLAT
74	DLST
75	DNAJC8
76	DNAJC9
77	DNPEP
78	EDD1
79	EEA1
80	EEF1B2
81	EFTUD2
82	EIF1AP1
83	EIF3A
84	EIF3C
85	EIF3D
86	EIF3E
87	EIF3G
88	EIF3H
89	EIF3L
90	EIF3M
91	EIF4B
92	ENSA
93	ERH
94	ESF1
95	EXOSC1
96	EXOSC2
97	EXOSC4
98	EXOSC5
99	EXOSC6
100	EXOSC7
101	EXOSC8
102	EXOSC9
103	FHL2
104	FIP1L1
105	FKBP7
106	FLJ11151
107	FTH1
108	FTL
109	FUS
110	GEMIN6
111	GMNN
112	GNPDA1
113	GNPDA2
114	GOLGB1
115	GOT1
116	GOT2
117	GPATCH8
118	GRIPAP1
119	GSR
120	GUSB
121	HDGF
122	HDGF2
123	HEMGN
124	HEPH
125	HERC1
126	HIST1H1C
127	HMGN2
128	HN1L
129	HNRNPA2B1
130	HNRNPAB
131	HNRNPD
132	HNRPDL
133	HPRT1
134	HRSP12
135	HSP90AA4P
136	HSP90AB4P
137	IKBKG
138	ISY1
139	ITIH4
140	KCTD3
141	KIAA1109
142	KTN1
143	LAMP2
144	LEO1
145	LIMA1
146	LIMD1
147	LIMS1
148	LOC442497
149	LOC642393
150	LOC650788
151	LOC653269
152	LOC728658
153	LSM2
154	LSM6
155	LTF
156	MAP1A
157	MAP4
158	MAP4
159	MARCKS
160	MARCKSL1
161	MCCC2
162	MED13
163	MED13L
164	MED8
165	METTL5
166	MFAP1
167	MPHOSPH6
168	MRPL15
169	MRPS27
170	MTFMT
171	NACA
172	NASP
173	NCL
174	NCOA6
175	NEBL
176	NEFH
177	NES
178	NFKBIL2
179	NHLRC3
180	NIF3L1
181	NIPSNAP3A
182	NKAP
183	NOLC1
184	NPC2
185	NSBP1
186	NT5C
187	NUDT21
188	NUDT5
189	NUP62
190	OPTN
191	PDAP1
192	PDCD5
193	PDCL3
194	PELP1
195	PHAX
196	PHF5A
197	PITPNA
198	PLCH1
199	PNN
200	POLA2
201	PPP1R14C
202	PPP1R9B
203	PPP2R4
204	PRKDC
205	PRKRIP1
206	PRPF19
207	PRPSAP2
208	PRR12
209	PSMA1
210	PSMA2
211	PSMA3
212	PSMA4
213	PSMA5
214	PSMA6
215	PSMA7
216	PSMB1
217	PSMB2
218	PSMB3
219	PSMB4
220	PSMB5
221	PSMB6
222	PSMB7
223	PSMB8
224	PSMC1
225	PSMC2
226	PSMD1
227	PSMD11
228	PSMD12
229	PSMD14
230	PSMD2
231	PSMD3
232	PSMD4
233	PSMD6
234	PSMD7
235	PSMD9
236	PTAR1
237	PTPRC
238	PUM2
239	PURA
240	PURB
241	PVRL2
242	QPRT
243	RAB11B
244	RAB12
245	RABEP1
246	RBKS
247	RBM8A
248	RBX1
249	RCN1
250	RCSD1
251	RPL10A
252	RPL18A
253	RPL35A
254	RPL6
255	RPL7
256	RPL8
257	RPP14
258	RPP40
259	RPS12
260	RPS27A
261	RRBP1
262	RRM2B
263	RRP15
264	RSL1D1
265	RYBP
266	SAFB
267	SAFB2
268	SART1
269	SDCCAG8
270	SEPSECS
271	SERBP1
272	SF3B4
273	SFRS1
274	SFRS18
275	SFRS2
276	SFRS2IP
277	SFRS5
278	SFRS7
279	SH3BGRL
280	SKIV2L2
281	SLC16A1
282	SLC1A5
283	SLC2A3
284	SLC7A5
285	SNRPA1
286	SNRPB
287	SNRPB2
288	SNRPC
289	SNRPD2
290	SNRPD3
291	SNRPF
292	SOD2
293	SSSCA1
294	STIP1
295	STX4
296	SYNCRIP
297	SYNGR2
298	TAF15
299	TANK
300	TBC1D14
301	TBC1D22A
302	TCOF1
303	TMEM102
304	TPD52L2
305	TPM4
306	TRPV2
307	TXNDC9
308	TXNL4A
309	UBR4
310	USP39
311	VCL
312	VCP
313	WARS
314	WDR43
315	YBX1
316	ZC3H18
317	ZC3H4
318	ZCCHC8
319	ZFPM1
320	ZNF326
321	ZNF330
322	ZNF787
323	ZZEF1
